# Supplementary material
Source: publisher figshare collection journal article supplement (https://brill.figshare.com/ndownloader/files/14478989)
Supplement: Supplementary file 1 [file 14478989]

Lecture 9

**Metaphor and metonymy in language teaching**

Idioms in language teaching.

Four ways in which idioms may be seen as motivated.

(1) How and to what degree are idioms motivated in one language?

(2) How and to what degree are idioms motivated in relation to two languages?

(3) How do different languages express idiomatic meanings?

(4) How and to what degree do the cultural-ideological bacgrounds underlying particular languages play a role in the expression of idiomatic meanings?

**Idioms and image schemas**

Dual coding: association of a word or expression with an image is called “dual coding.”

*figure out, point out* and *find out*. (Boers, 2000)

image schema associated with *out* in which something is first inside a container and thus not visible from the outside but when, subsequently, it moves out of the container, it becomes visible.

knowing is seeing. Why *out*? Why does it mean what it does? (‘to get to know something’).

**Poetic language**

*Hamlet*, Horatio says this at the prince’s deathbed:

Now cracks a noble heart. Good night, sweet prince,

And flights of angels sing thee to thy rest!

life is a fluid in a container metaphor and the heart for the person metonymy.

death is night, the object of liking/love is sweet, and the object of love is a young child.

death is sleep/rest metaphor.

“caused motion”: “And flights of angels sing thee to thy rest.” *Sing* primarily is an intransitive verb, like *sneeze* and *walk*. It is used innovatively in the construction.

it can only appear in the construction in a particular cultural context; namely, it assumes a Christian world view with angels who sing, heaven as our eternal resting place, and so on.

**How and to what degree are idioms motivated in one language?**

Traditional view:

Idioms: unmotivated meaning. Idioms are structures that consist of two or more words whose overall meaning cannot be predicted from the meaning of the constitutive parts.

Cognitive linguistic view: it maintains that to a large extent it can be motivated. motivation of idioms: metaphor, metonymy, and everyday knowledge (Lakoff, 1987).

He was *spitting fire*.

The *fire* between them finally *went out*.

The painting *set fire to* the composer's imagination.

The killing *sparked off* riots in the major cities.

He was *burning the candle at both ends*.

The bank robber *snuffed out* Sam's life.

The speaker *fanned the flames* of the crowd's enthusiasm.

initial stage of fire (*set fire to*), final stage of fire (*snuff out*), use of an energy source (*burn the candle at both ends*), maintenance of the intensity of fire (*fan the flames*), danger of the high intensity of fire (*spit fire*), etc.

not particular words but the entire conceptual domain of fire participates in the creation of such idioms.

He was *spitting fire*. – anger is fire.

The *fire* between them finally *went out*. – love is fire

The painting *set fire to* the composer's imagination. – imagination is fire

The killing *sparked off* riots in the major cities. – conflict is fire

He was *burning the candle at both ends*. – energy is fire

The bank robber *snuffed out* Sam's life. – life is fire

The speaker *fanned the flames* of the crowd's enthusiasm. enthusiasm is fire

anger is fire

After the row, he *was spitting fire*.

*Smoke was coming out* of his ears.

He is *smoldering* with anger.

She was *fuming*.

Boy, am I *burned up*!

love is fire

The *fire* between them finally *went out*.

I am *burning* with love.

She *carries a torch for* him.

The *flames are gone* from our relationship.

imagination is fire

The painting *set fire to* the composer's imagination.

His imagination *caught fire*.

Her imagination is *on fire*.

The story *kindled* the boy's imagination.

conflict is fire

The killing *sparked off* the riot.

The *flames* of war *spread* quickly.

The country was *consumed* by the *inferno* of war.

They extinguished the *last sparks* of the revolution.

energy is fuel for the fire

Don't *burn the candle at both ends*.

I am *burned out*.

I need someone *to stoke my fire*.

life is fire

The bank robber *snuffed out* Sam’s life.

There was hardly any *flicker* of life in him.

She’s a woman *burning with* life.

enthusiasm is fire

The speaker *fanned the flames* of the crowd's enthusiasm.

The team played so well that the crowd *caught fire*.

He was *burning* with excitement.

Don't be a *wet blanket*.

Her enthusiasm was *ignited* by the new teacher.

cognitive mechanism of conceptual metaphor, such as anger is fire, love is fire, etc. provides motivation for the many idioms to exist.

conceptual metaphors also help us explain, and thus motivate, why the idioms and the metaphorically used words mean what they do. Mappings.

the thing burning  the angry person;

the heat of fire  the anger;

the cause of fire  the cause of anger;

the degree of the heat  the intensity of anger;

etc.

Same mappings:

intensity is heat

the thing burning  the person in a state / process

the fire  the state/process (like anger, love, imagination)

the cause of the fire  the cause of the state/process

the beginning of the fire  the beginning of the state/process

the existence of the fire  the existence of the state/process

the end of the fire  the end of the state/process

the degree of the heat of the fire  the intensity of the state/process

The generalized mappings of the sort we saw above can systematically explain why idioms and words mean what they do outside their primary application. The use of this kind of motivation may contribute to the learning of idioms in a foreign language, as some studies indicate (see, e.g., Kövecses and Szabó, 1996; Boers, 1997, 2000, 2004).

**How and to what degree are idioms motivated in relation to two languages?**

across several languages? - simple survey on the internet.

abstract complex systems.

theories are building,

relationships are building,

a company is a building,

economic systems are buildings,

a career is a building, life is a building, etc.,

Japanese: one also „*constructs* a theory,” „relationships are *built* and *ruined*,” „economic systems may be *built*,” „one’s life may have a *foundation*,” etc.

Brazilian Portugese. abstract complex systems metaphor is clearly present in Portugese. Theories, relations, life, etc. are all conceptualized as building.

Tunisian Arabic: same as in English, with some differences in the scope of the building metaphor between English and Arabic.

Hungarian: building source domain has an application very similar to English, and thus to Japanese, Portugese, and Arabic.

Five very different languages, English, Japanese, Portugese, Arabic, and Hungarian, have the same generic-level metaphor abstract complex systems are buildings.

Do the expressions have (at least roughly) the same meanings across the languages?

mappings. *ruin/destroy*, in the different languages in different specific-level metaphors:

Japanese:

kanojo-no risooshugi-wa hookai sita.

she-Gen. idealism-Topic ruin Past

"Her idealism got ruined."

Brazilian Portugese:

O casamento deles esta em ruinas.

Their marriage is falling into ruins.

Tunisian Arabic:

tabba3 is-siyaasa w-hadd mustaqblu bi-ydiih

“He followed politics, and destroyed his career by his own hands.”

theories are buildings, relationships are buildings, and careers are buildings: „for a building to be ruined/destroyed  for a theory/relationship/career to end.”

It seems that universally similar experiences (the building process, the building itself, the destruction of the building, etc.) create universal sets of meanings conveyed by the generic-level metaphor abstract complex systems are buildings.

(near-)universal metaphors and their mappings. Relatively small number of conceptual devices (conceptual metaphors, mappings), we can find motivation for a large number of idioms and other metaphoric expressions and their meanings across a wide range of different languages.

**How do different languages express idiomatic meanings?**

a simple experiment. time is money (Lakoff and Johnson, 1980).

1. Are the words used for the expression of the metaphor in the two languages the same or different?
2. Is the literal meaning of the words used in the two languages the same or different?
3. Is the figurative meaning of the words used in the two languages the same or different?
4. Do the words used in the two languages belong to the same or different conceptual metaphor(s)? (Kövecses, 2005)

Three patterns:

You’re *wasting* my time.

Pazarlod az időmet.

[waste the time-my]

word form: different, literal meaning: same, figurative meaning: same, and conceptual metaphor: same.

He’s living on *borrowed* time.

(a) Minden nap ajándék számára.

[every day gift for-him]

(b) Kapott egy kis időt ajándékba az élettől.

[got one little time as-a-gift the life-from]

word form: different, literal meaning: different, figurative meaning: same, and conceptual metaphor: same.

How do you *spend* your time these days?

Mivel/hogy(an) töltöd az idődet mostanában?

[with what/how fill-you the time-yours nowadays]

time is a container. word form: different, liteal meaning: different, figurative meaning: same, and conceptual metaphor: different.

the three patterns that characterize the expression of the time is money (valuable commodity) metaphor in Hungarian in relation to English are:

different, same, same, same

different, different, same, same

different, different, same, different

Similar but sufficiently large-scale studies may reveal which patterns are favored or less favored in the expression of figurative meaning in relation to other languages and other conceptual metaphors.

**How and to what degree do the cultural-ideological bacgrounds underlying particular languages play a role in the expression of idiomatic meanings?**

love is a journey (Lakoff and Johnson, 1980).

the finer details of translation pointed to interesting potential differences between American English and its cultural context and Hungarian and its cultural context. (Kövecses, 2003, 2005.)

We’re *stuck.*

*Elakadtunk.

Kapcsolatunk elakadt.

[relationship-our stuck]

We’ve *gotten off the track.*

*Kisiklottunk.

?Kapcsolatunk kisiklott.

[relationship-our got-off-the-track]

Kapcsolatunk megfeneklett.

[relationship-our ran-aground]

While American English appears to favor a more agent-like and action-oriented way of expressing the conceptual metaphor, Hungarian prefers a more passivity-oriented way of expression.

We’ll just have to *go our separate ways*.

*Külön utakra kell lépnünk.

Elválnak útjaink.

[separate ways-our]

We can’t *turn back now.*

*Nem fordulhatunk vissza.

(Innen) már nincs visszaút.

[(from-here) already no back-way]

More generally, we can say that Hungarians express the conceptual metaphor in a somewhat fatalistic way, foregrounding the inevitable force of external circumstances on human decisions. This is different from English, where speakers take into account such circumstances, but they make their decisions about the relationship in light of their own internal judgments of them.

Look *how far we’ve come.*

?Nézd/látod milyen messzire jutottunk!/?

[look/see how far got-we]

*Where* are we?

?Hol vagyunk most?

[where are-we now]

It seems that Hungarians have a much less extroverted attitude to their love relationships than speakers of American English (or at least a group of them).

Such cultural differences include opposing values, like activity-passivity, optimistic-fatalistic, and extroverted-introverted in the world view of the two cultural-linguistic communities.

**Conclusion**

(1) The existence of many idioms and their meaning in particular languages derives from the presence of certain conceptual metaphors and that of systematic mappings in the mind of the speakers of these languages.

(2) The existence of the same conceptual metaphor and their (metaphor-based) idiomatic expressions (together with their meanings) derive from some (near-)universal conceptual metaphors and the systematic mappings constituting them.

(3) However, the linguistic expression of the same conceptual metaphor may vary from language to language. Speakers of different languages seem to have different patterns in expressing the conceptual metaphors.

(4) The expression of the same conceptual metaphor may differ not only in the types of patterns speakers of different languages tend to make use of but also in the cultural-ideological backgrounds underlying the languages.

We need a great deal more systematicity in the teaching of idioms in foreign languages than we presently do.

**References**

Boers, F. 1997. No pain, no gain: a test for cognitive semantics? *Metaphor and symbol*, 12/4. 231-241.

Boers, F. 2000. Metaphor awareness and vocabulary retention. *Applied Linguistics,* 21/4. 553-571.

Boers, F. 2004. Expanding learners’ vocabulary through metaphor awareness: what expansion, what Learners, what Vocabulary? In: Achard, M. and Niemeier, S. (eds.) *Cognitive Linguistics, Second Language Acquisition, and Foreign Language Teaching*. Berlin: Mouton de Gruyter. 211-233.

Deignan, A. 1995. *Collins Cobuild English Guides (Vol. 7), Metaphor.* London: Harper-Collins.

Kövecses, Z. 2002. *Metaphor. A Practical Introduction*. Oxford: Oxford University Press.

Kövecses, Z. 2005. *Metaphor in Culture. Universality and Variation*. Cambridge: Cambridge University Press.

Kövecses, Z. és Szabó P. 1996. Idioms: a view from cognitive semantics. *Applied Linguistics*, 17-3, 326-355.

Lakoff, G. 1987. *Women, Fire, and Dangerous Things. What Categories Reveal about the Mind*. Chicago: The University of Chicago Press.

Lakoff, G. és M. Johnson. 1980. *Metaphors We Live By*. Chicago: The University of Chicago Press.
